# Supplementary material
Source: publisher figshare collection journal article supplement (https://springernature.figshare.com/ndownloader/files/22714790)
Supplement: Supplementary file 1 [file 22714790]

Measurement(s),Biomechanics • Kinetics • kinematics • walking • Above-Knee Amputation • transfemoral amputation
Technology Type(s),motion capture system • treadmill
Factor Type(s),Medicare Functional Classification Level • walking speed
Sample Characteristic - Organism,Homo sapiens
